# Supplementary material for: Explore association of genes in PDL1/PD1 pathway to radiotherapy survival benefit based on interaction model strategy
Source: Radiat Oncol. 2021 Nov 18;16:223. doi: 10.1186/s13014-021-01951-x (PMC8600865; doi:10.1186/s13014-021-01951-x)
Supplement: Supplementary file 3 — Additional file 3. Table S1: 73 genes in “PD-L1 expression and PD-1 checkpoint pathway in cancer”. [file 13014_2021_1951_MOESM3_ESM.xlsx]

## Sheet: PD-1 genes
ID	Definition
PIK3CA_B_D	phosphatidylinositol-4,5-bisphosphate 3-kinase catalytic subunit alpha/beta/delta [EC:2.
PTEN	phosphatidylinositol-3,4,5-trisphosphate 3-phosphatase and dual-specificity protein phosphatas
PLCG1	phosphatidylinositol phospholipase C, gamma-1 [EC:3.1.4.11]
NFKB1	nuclear factor NF-kappa-B p105 subunit
NFKBIB	NF-kappa-B inhibitor beta
PIK3R1_2_3	phosphoinositide-3-kinase regulatory subunit alpha/beta/delta
HRAS	GTPase HRas
CSNK2A	casein kinase II subunit alpha [EC:2.7.11.1]
CSNK2B	casein kinase II subunit beta
TRAF6	TNF receptor-associated factor 6 [EC:2.3.2.27]
PPP3C, CNA	serine/threonine-protein phosphatase 2B catalytic subunit [EC:3.1.3.16]
RASGRP1	RAS guanyl-releasing protein 1
EGF	epidermal growth factor
EGFR, ERBB1	epidermal growth factor receptor [EC:2.7.10.1]
RAF1	RAF proto-oncogene serine/threonine-protein kinase [EC:2.7.11.1]
MAP2K1, MEK1	mitogen-activated protein kinase kinase 1 [EC:2.7.12.2]
MAP2K2, MEK2	mitogen-activated protein kinase kinase 2 [EC:2.7.12.2]
ERK, MAPK1_3	mitogen-activated protein kinase 1/3 [EC:2.7.11.24]
FOS	proto-oncogene protein c-fos
MAP3K3, MEKK3	mitogen-activated protein kinase kinase kinase 3 [EC:2.7.11.25]
MAP2K3, MKK3	mitogen-activated protein kinase kinase 3 [EC:2.7.12.2]
MAP2K6, MKK6	mitogen-activated protein kinase kinase 6 [EC:2.7.12.2]
P38	p38 MAP kinase [EC:2.7.11.24]
NFATC1, NFAT2, NFATC	nuclear factor of activated T-cells, cytoplasmic 1
JAK2	Janus kinase 2 [EC:2.7.10.2]
JUN	transcription factor AP-1
AKT	RAC serine/threonine-protein kinase [EC:2.7.11.1]
IKBKA, IKKA, CHUK	inhibitor of nuclear factor kappa-B kinase subunit alpha [EC:2.7.11.10]
IFNG	interferon gamma
RPS6KB	ribosomal protein S6 kinase beta [EC:2.7.11.1]
STAT3	signal transducer and activator of transcription 3
MYD88	myeloid differentiation primary response protein MyD88
NFKBIA	NF-kappa-B inhibitor alpha
RELA	transcription factor p65
ALK, CD246	anaplastic lymphoma kinase [EC:2.7.10.1]
IFNGR1, CD119	interferon gamma receptor 1
IFNGR2	interferon gamma receptor 2
TIRAP	toll-interleukin 1 receptor (TIR) domain-containing adaptor protein
TIRP, TRAM	TRIF-related adaptor molecule
PTPN6, SHP-1	tyrosine-protein phosphatase non-receptor type 6 [EC:3.1.3.48]
TRIF	toll-like receptor adapter molecule 1
LCK	lymphocyte cell-specific protein tyrosine kinase [EC:2.7.10.2]
NFKBIE	NF-kappa-B inhibitor epsilon
PPP3R, CNB	serine/threonine-protein phosphatase 2B regulatory subunit
CD3D	T-cell surface glycoprotein CD3 delta chain
CD3E	T-cell surface glycoprotein CD3 epsilon chain
CD3G	T-cell surface glycoprotein CD3 gamma chain
CD3Z, CD247	CD3Z antigen, zeta polypeptide
CD4	T-cell surface glycoprotein CD4
CD28	CD28 antigen
PDCD1, PD1, CD279	programmed cell death protein 1
PDL1, CD274	programmed cell death 1 ligand 1
MTOR, FRAP, TOR	serine/threonine-protein kinase mTOR [EC:2.7.11.1]
IKBKB, IKKB	inhibitor of nuclear factor kappa-B kinase subunit beta [EC:2.7.11.10]
IKBKG, IKKG, NEMO	inhibitor of nuclear factor kappa-B kinase subunit gamma
PTPN11	tyrosine-protein phosphatase non-receptor type 11 [EC:3.1.3.48]
ZAP70	tyrosine-protein kinase ZAP-70 [EC:2.7.10.2]
LAT	linker for activation of T cells
KRAS, KRAS2	GTPase KRas
NRAS	GTPase NRas
HIF1A	hypoxia-inducible factor 1 alpha
BATF	ATF-like basic leucine zipper transcriptional factor
TLR2, CD282	toll-like receptor 2
TLR4, CD284	toll-like receptor 4
TLR9, CD289	toll-like receptor 9
TRAV	T cell receptor alpha chain V region
TRBV	T-cell receptor beta chain V region
JAK1	Janus kinase 1 [EC:2.7.10.2]
STAT1	signal transducer and activator of transcription 1
EML4	echinoderm microtubule-associated protein-like 4
NFATC2, NFAT1, NFATP	nuclear factor of activated T-cells, cytoplasmic 2
NFATC3, NFAT4	nuclear factor of activated T-cells, cytoplasmic 3
PRKCQ	novel protein kinase C theta type [EC:2.7.11.13]
